1  
2  
3  
4  
5  
6  
7  
8  
9  
10  
11  
12  
13  
14  
15  
16  
17  
18  
19  
20  
21  
22  
23  
24

**Rspo2 inhibits TCF3 phosphorylation to antagonize Wnt signaling during  
vertebrate anteroposterior axis specification**

Alice H. Reis and Sergei Y. Sokol

Department of Cell, Developmental and Regenerative Biology,  
Icahn School of Medicine at Mount Sinai, New York

\*Correspondence: Sergei Y. Sokol, Ph. D.,  
Phone: 1-212-241-1757; Fax: 1-212-860-9279  
E-mail: [sergei.sokol@mssm.edu](mailto:sergei.sokol@mssm.edu)

**Keywords**

R-spondins, Wnt, beta-catenin, phosphorylation, TCF3, TCF7L1, Xenopus

25

26

27 **Summary**

28

29 **The Wnt pathway activates target genes by controlling the  $\beta$ -catenin-T-cell**  
30 **factor (TCF) transcriptional complex during embryonic development and**  
31 **cancer. This pathway can be potentiated by R-spondins, a family of**  
32 **proteins that bind RNF43/ZNRF3 E3 ubiquitin ligases and LGR4/5 receptors**  
33 **to prevent Frizzled degradation. Here we demonstrate that, during *Xenopus***  
34 **anteroposterior axis specification, Rspo2 functions as a Wnt antagonist,**  
35 **both morphologically and at the level of gene targets and pathway**  
36 **mediators. Unexpectedly, the binding to RNF43/ZNRF3 and LGR4/5 was not**  
37 **required for the Wnt inhibitory activity. Moreover, Rspo2 did not influence**  
38 **Dishevelled phosphorylation in response to Wnt ligands, suggesting that**  
39 **Frizzled activity is not affected. Further analysis indicated that the Wnt**  
40 **antagonism is due to the inhibitory effect of Rspo2 on TCF3/TCF7L1**  
41 **phosphorylation that normally leads to target gene activation. Consistent**  
42 **with this mechanism, Rspo2 anteriorizing activity has been rescued in**  
43 **TCF3-depleted embryos. These observations suggest that Rspo2 is a**  
44 **context-specific regulator of TCF3 phosphorylation and Wnt signaling.**

45

46

47

48

49

## 50 Introduction

51

52 The Wnt pathway is a key conserved developmental pathway that is utilized  
53 multiple times during animal development and frequently misregulated in disease  
54 (MacDonald et al., 2009; Nusse and Clevers, 2017). Secreted Wnt proteins  
55 associate with Frizzled (Fzd) receptors and LRP5/6 coreceptors to stabilize  $\beta$ -  
56 catenin and promote  $\beta$ -catenin/T-cell factor (TCF)-dependent transcription.  
57 TCF3, also known as TCF7L1, is a predominant embryonic TCF that functions as  
58 a transcriptional repressor during early development (Hikasa et al., 2010; Kim et  
59 al., 2000; Nguyen et al., 2006). In the presence of Wnt ligands, TCF3 is  
60 phosphorylated, followed by its dissociation from target promoters and  
61 transcriptional activation that can involve other TCF/LEF transcription factors  
62 including TCF1/TCF7 (Cadigan and Waterman, 2012; Hikasa and Sokol, 2011).  
63 Whereas many studies of the Wnt pathway mainly focused on the control of  $\beta$ -  
64 catenin stability, the regulation of TCF protein activity has been less understood.

65

66 R-spondins are prominent extracellular modulators of Wnt signaling in  
67 vertebrates (Niehrs, 2012). The R-spondin (Rspo) family consists of four secreted  
68 proteins that share high similarity of amino acid sequence and structural  
69 organization and play critical roles in development, stem cell biology and cancer  
70 (de Lau et al., 2014; Raslan and Yoon, 2019). Mice lacking the *rspo2* gene die at  
71 birth due to lung, limb and craniofacial defects, illustrating its essential functions  
72 in embryogenesis (Aoki et al., 2008; Bell et al., 2008; Nam et al., 2007; Yamada  
73 et al., 2009). Additionally, Rspo2 has been implicated in fish skeletogenesis  
74 (Tatsumi et al., 2014) and frog muscle development (Kazanskaya et al., 2004).

75 The closely related *Rspo3* functions in early angiogenesis in mouse and *Xenopus*  
76 embryos (Aoki et al., 2007; Kazanskaya et al., 2008). These observations  
77 highlight the important functions of R-spondins during embryonic development.

78

79 R-spondins are thought to exert their effects by potentiating Wnt/ $\beta$ -catenin  
80 signaling (Bell et al., 2008; de Lau et al., 2014; Kazanskaya et al., 2004; Raslan  
81 and Yoon, 2019). R-spondins bind LGR4/5 receptors and the E3 ubiquitin ligases  
82 ZNRF3/RNF43, thereby stabilizing Frizzled and promoting Wnt signaling  
83 (Carmon et al., 2011; de Lau et al., 2011; Hao et al., 2012; Koo et al., 2012).

84 Recent analysis revealed that the mechanisms used by R-spondins to modulate  
85 Wnt signaling are more complex (Park et al., 2018; Yan et al., 2017). R-spondins  
86 can affect the Wnt pathway independently of LGR4/5 (Lebensohn and Rohatgi,  
87 2018; Szenker-Ravi et al., 2018), indicating the existence of multiple receptors  
88 and alternative signaling pathways. Supporting this view, the interaction with  
89 heparan sulfate chains is sufficient for R-spondins to modulate Wnt signaling in  
90 cells lacking LGR4/5/6 receptors (Dubey et al., 2020).

91

92 The Wnt pathway plays crucial and specific roles during anteroposterior axis  
93 specification and patterning (De Robertis and Kuroda, 2004; Heasman, 2006;  
94 Hikasa and Sokol, 2013). Wnt signals promote posterior structures in the embryo,  
95 whereas secreted Wnt antagonists in the anterior region are responsible for head  
96 development (Itoh et al., 1995; Kiecker and Niehrs, 2001). One of the reported  
97 gain-of-function phenotypes for *Rspo2* in *Xenopus* is the formation of ectopic  
98 cement gland (Kazanskaya et al., 2004), an anterior mucus-secreting organ  
99 (Picard, 1975; Sive et al., 1989). Notably, this phenotype is a common property

100 of Wnt antagonists including GSK3 (Itoh et al., 1995), Axin-related protein (Itoh  
101 et al., 2000) and is exhibited in embryos with depleted  $\beta$ -catenin (Heasman et al.,  
102 2000). Since this observation is contrary to what is expected of a Wnt coactivator,  
103 we decided to reevaluate a role of Rspo2 in the Wnt pathway during *Xenopus*  
104 anteroposterior patterning. We show that Rspo2 inhibits Wnt signaling in a  
105 manner that is independent of the LGR4/5 and ZNRF3/RNF43 interactions.  
106 Mechanistically, we find that Rspo2 downregulates TCF3 phosphorylation that is  
107 necessary for target gene activation. Our findings indicate that the same R-  
108 spondin can function in a context-dependent manner to either stimulate or inhibit  
109 the Wnt pathway.

110

111

## 112 **Results**

113

### 114 **Rspo2 is essential for anterior development**

115 To better characterize the role of Rspo2 in anteroposterior patterning, Rspo2  
116 RNA was injected into early embryos. Confirming earlier findings (Kazanskaya  
117 et al., 2004; Reis and Sokol, 2020), the injected embryos developed enlarged  
118 cement gland and other head structures (Fig. 1A, B). We next defined early  
119 genes induced by Rspo2 by carrying out transcriptome analysis in the ectoderm  
120 explants expressing Rspo2 RNA at the onset of gastrulation. We observed the  
121 induction of many anterior genes, including *otx1*, *otx2*, and *otx5*, *zic3*, *rax*  
122 (Supplementary Fig. 1). RT-qPCR validated the induction of *otx2* and *ag1* (Sive  
123 et al., 1989), whereas the level of *krt12.4*, epidermal keratin, has decreased (Fig.  
124 1C). *Otx* genes are required for anterior development and cement gland formation

125 (Blitz and Cho, 1995; Pannese et al., 1995), suggesting that they could be  
126 responsible for the observed Rspo2 activity.

127

128 In complementary experiments, Rspo2 has been depleted using previously  
129 characterized translation-blocking (RMO<sup>ATG</sup>) and splicing-blocking (RMO<sup>SB</sup>)  
130 morpholino oligonucleotides (MOs)(Reis and Sokol, 2020). Both MOs strongly  
131 reduced *otx2* and *ag1* levels (Fig. 1D), causing severe head defects (Reis and  
132 Sokol, 2020). Because RMO<sup>ATG</sup> was more effective for the Rspo2 knockdown, it  
133 has been predominantly used in subsequent experiments.

134

135 Examination of ectodermal markers in Rspo2-overexpressing embryos by *in situ*  
136 hybridization revealed the expansion of the anterior neural plate at the expense  
137 of epidermal keratin *krt12.4* in embryos overexpressing Rspo2 (Fig. 1E, F,  
138 Supplementary Table 1). By contrast, the anterior neural domain was reduced in  
139 Rspo2 morphants (Fig. 1G, Supplementary Table 1). Similarly, the domains of  
140 *foxg1* and *cdx4* expression have been coordinately regulated by Rspo2  
141 manipulation (Fig. 1H-J). Taken together, these observations illustrate an  
142 essential role of Rspo2 in anterior development.

143

144 We next evaluated whether the observed effect of Rspo2 is mediated by its  
145 interaction with ZNRF3/RNF43 and LGR4/5 (Carmon et al., 2011; de Lau et al.,  
146 2011; Hao et al., 2012; Koo et al., 2012; Wang et al., 2013; Xie et al., 2013;  
147 Zebisch and Jones, 2015). We generated point mutations in the sequence of the  
148 furin-like domains that eliminate the binding of Rspo2 to ZNRF3/RNF43 and  
149 LGR4/5 (Xie et al., 2013). These mutants were expressed at similar levels and

150 induced enlarged or ectopic cement glands in the majority of the injected embryos  
151 (Supplementary Fig. 2). These findings suggest that the binding of Znr3/Rnf43  
152 and Lgr4/5 is not required for Rspo2 ability to anteriorize the embryo.

153

#### 154 **Rspo2 is a Wnt antagonist**

155

156 The anteriorized phenotype caused by Rspo2 is similar to the ones generated by  
157 Wnt antagonists (Glinka et al., 1998; Heasman et al., 2000; Itoh et al., 2000; Itoh  
158 et al., 1995; Wang et al., 1997; Zhang et al., 2012). We therefore wanted to  
159 examine whether Rspo2 could antagonize Wnt signaling.

160

161 During gastrulation, Wnt8 enhances posterior development by inducing a distinct  
162 set of target genes (Christian and Moon, 1993; Hamilton et al., 2001; Hikasa and  
163 Sokol, 2013). To evaluate how Rspo2 affects Wnt signaling, it was co-expressed  
164 with Wnt8 in dorsal blastomeres of four-cell embryos. As expected, the majority  
165 of embryos injected with *wnt8* DNA became headless (Fig. 2A-C). Separate  
166 injections of *Rspo2* RNA into dorsal blastomeres produced blastopore closure  
167 defects (Fig. 2D). When coexpressed with Wnt8, Rspo2 completely rescued the  
168 headless phenotype in most of the injected embryos (Fig. 2E, F), revealing its  
169 Wnt inhibitory activity.

170

171 This result suggests that Rspo2 prevents the activation of specific Wnt target  
172 genes that are involved in posterior development (Ding et al., 2017; Kjolby and  
173 Harland, 2017; Nakamura et al., 2016; Nakamura and Hoppler, 2017). In  
174 ectoderm explants stimulated with Wnt8, Rspo2 downregulated the known Wnt

175 targets *axin2* (Jho et al., 2002), *cdx4* (Northrop and Kimelman, 1994),  
176 *mesogenin1/msgn1* (Chalamalasetty et al., 2014; Wittler et al., 2007) and *myod1*  
177 (Hoppler et al., 1996) (Fig. 2G and Supplementary Fig. 3). Importantly, *axin2* was  
178 also inhibited by Rspo2 overexpression and upregulated after Rspo2 depletion in  
179 the marginal zone, where endogenous Wnt signaling takes place (Fig. 2H).

180

181 To confirm the specific effect of Rspo on Wnt signaling, we used the transgenic  
182 frog line *Xla.Tg(WntRES:dEGFP)<sup>Vlemx</sup>*, that contains a multimerized Wnt response  
183 element driving the expression of destabilized GFP (Tran et al., 2010).  
184 Coinjection of Rspo2 RNA into the transgenic embryos with mRFP RNA as a  
185 lineage tracer suppressed GFP fluorescence at the injected side (Fig. 3A-C),  
186 demonstrating the Wnt inhibitory activity of Rspo2.

187

188 This effect was estimated in a more quantitative way by immunoblotting of the  
189 lysates from both Rspo2-overexpressing and Rspo2-depleted embryos. Whole  
190 lysates from the embryos injected with Rspo2 RNA contained less GFP, whereas  
191 the lysates from the embryos injected with either MO contained more GFP,  
192 compared to the control embryos (Fig. 3D). Moreover, in ectoderm explants,  
193 Wnt3a-stimulated reporter activity was decreased by Rspo2 and upregulated by  
194 RMO<sup>ATG</sup> (Fig. 3E).

195

196 Together, these findings indicate that Rspo2 antagonizes the Wnt pathway during  
197 anteroposterior axis specification.

198

199



## 200 **Rspo2 inhibits TCF3 phosphorylation**

201

202 R-spondins are composed of two furin-like domains at the N-terminus, one  
203 thrombospondin type 1 domain (TSP) and the C-terminus enriched in basic amino  
204 acid residues (de Lau et al., 2014; Raslan and Yoon, 2019). To examine the  
205 mechanism, by which Rspo2 affects Wnt signaling, we assessed the ability of  
206 several Rspo2 constructs with specific domain deletions (Fig. 4A) to interfere with  
207 Wnt signaling.

208

209 First, we asked which constructs retain the ability of full length Rspo2 to  
210 anteriorize the embryo. Rspo2 lacking the TSP domain (Rspo $\Delta$ T) had a strong  
211 cement gland-inducing activity (Supplementary Fig. 4A, D). Rspo $\Delta$ F also slightly  
212 enhanced head development, but the effect was much weaker than that of  
213 Rspo $\Delta$ T and the wild-type Rspo2 (Supplementary Fig. 4B, C). These  
214 observations are consistent with furin-like domains playing an important role in  
215 the inhibition of the Wnt pathway that is independent of the known Rspo2  
216 receptors.

217

218 To address a specific mechanism of Wnt pathway inhibition by Rspo2, we  
219 analyzed Dvl phosphorylation, a common proximal event in Wnt/Frizzled  
220 signaling (Angers and Moon, 2009; Yanagawa et al., 1995). Phosphorylated Dvl2  
221 migrated slower in ectoderm cells stimulated with Wnt8, Wnt3a and Wnt5a.  
222 Rspo2 constructs did not affect Dvl2 mobility on their own or in response to Wnt  
223 signals (Fig. 4B), suggesting that Rspo2 does not operate by modulating the  
224 activity of Wnt ligands or Frizzled receptors.

225

226 We next evaluated the effect of Rspo2 on the downstream signaling  
227 intermediates TCF3 and  $\beta$ -catenin. The phosphorylation of TCF3 in response to  
228 a Wnt signal leads to TCF3 dissociation from target promoters and transcriptional  
229 derepression of Wnt target genes (Hikasa et al., 2010). TCF3 phosphorylation  
230 was visualized by the slower mobility of the TCF3 band from the lysates of  
231 ectoderm explants expressing Wnt8 (Fig. 4C). TCF3 migrated faster in the lysates  
232 of cells co-expressing Rspo2. Importantly, both Rspo $\Delta$ F and Rspo $\Delta$ T inhibited  
233 TCF3 phosphorylation, although Rspo $\Delta$ F was less effective in this assay. In the  
234 absence of Wnt ligands, we observed that TCF3 levels were consistently higher  
235 in cells expressing Rspo2 constructs, suggesting that Rspo2 might also influence  
236 TCF3 protein stability. In the same experiment, levels of non-phosphorylated  $\beta$ -  
237 catenin increased in response to Wnt8, and this effect was reversed by Rspo2  
238 constructs (Fig. 4C).

239

240 Many Wnt gene targets are also controlled by the FGF pathway (Kjolby et al.,  
241 2019; McGrew et al., 1997) and the FGF pathway was reported essential for Wnt  
242 activity during anteroposterior patterning (Domingos et al., 2001). Since Rspo2  
243 reduces FGF signaling in the same system (Reis and Sokol, 2020), it is possible  
244 that the effect of Rspo constructs on TCF3 is indirect, due to the suppression of  
245 the FGF pathway. Treating the explants with the FGF receptor inhibitor SU5402  
246 under the conditions when FGF signaling is completely blocked (Fletcher and  
247 Harland, 2008; Mohammadi et al., 1997) did not interfere with TCF3  
248 phosphorylation in response to Wnt3a (Fig. 4D). This result indicates that TCF3  
249 phosphorylation by Wnt3a does not require FGF signaling and that the effect of

250 Rspo2 constructs on the Wnt pathway is direct, rather than indirect, through the  
251 suppression of FGF signaling activity.

252

253 Our conclusions have been extended to endogenous Wnt signaling that is  
254 responsible for TCF3 phosphorylation in the mesoderm (marginal zone) during  
255 gastrulation (Hikasa et al., 2010). Rspo2 and Rspo $\Delta$ T constructs inhibited TCF3  
256 phosphorylation in ventral marginal zone explants, while Rspo $\Delta$ F had a mild  
257 effect (Fig. 4E). Notably, SU5402 had little effect on TCF3 phosphorylation in  
258 these explants, further indicating that TCF3 is regulated predominantly by the  
259 Wnt pathway (Fig. 4F). These observations support our conclusion that Rspo2  
260 antagonizes Wnt signaling by blocking TCF3 phosphorylation.

261

262 Furthermore, TCF3 phosphorylation became prominent in the dorsal marginal  
263 zone explants isolated from Rspo2 morphants (Fig. 4G). This effect correlated  
264 with the accumulation of non-phosphorylated  $\beta$ -catenin. By contrast, no  
265 significant changes in Dvl2 levels or mobility have been observed, suggesting  
266 that Frizzled receptors are not involved. Based on these results, we propose that  
267 Rspo2 enhances anterior development by inhibiting TCF3 phosphorylation.

268

269

### 270 **The Wnt-inhibitory activity of Rspo2 relies on TCF3**

271 If Rspo2 modulates Wnt target genes by inhibiting TCF3 phosphorylation, the  
272 depletion of TCF3 should prevent Rspo2 gain-of-function phenotype. Consistent  
273 with this prediction, the anteriorized phenotype of Rspo $\Delta$ T- expressing embryos  
274 was suppressed by TCF3 depletion (Fig. 5A, B). Rspo $\Delta$ T protein levels did not

275 change in TCF3-depleted embryos, supporting knockdown specificity (Fig. 5C).

276 This result suggests that the Wnt antagonistic activity of Rspo2 requires TCF3.

277

278 In a converse experiment, Rspo2 depletion is predicted to be rescued by a

279 constitutive TCF3 repressor that does not bind  $\beta$ -catenin ( $\Delta\beta$ TCF3) (Hikasa et al.,

280 2010). Supporting this expectation, the effect of Rspo2 depletion on both anterior

281 (*otx2* and *ag1*), and posterior (*cdx4* and *mshn1*) markers were partially rescued

282 in the morphants by  $\Delta\beta$ TCF3 (Fig. 6A).

283

284 Based on these observations, we propose that the Wnt-inhibitory function of

285 Rspo2 is mediated by TCF3, a predominant TCF in early embryos that functions

286 as a transcriptional repressor. By contrast, other TCF proteins mediating Wnt

287 signaling, such as TCF1/Tcf7 or Lef1, can activate Wnt targets. Notably, Rspo2

288 did not downregulate *axin2* induction by *tcf1* RNA in ectoderm cells, whereas it

289 significantly reduced Wnt8 activity in the same experiment (Fig. 6B). This

290 observation suggests a model, in which Rspo2 prevents the ability of Wnt

291 signaling to inhibit TCF3 repressive activity, but does not downregulate TCF1-

292 dependent signaling (Fig. 6C).

293

## 294 **Discussion**

295

296 This study has been focused on Rspo2, a member of the R-spondin family of Wnt

297 pathway modulators. We demonstrate that Rspo2 promotes anterior

298 development by inhibiting TCF3 phosphorylation and Wnt target genes

299 activation independently of the known interaction with LGR4/5 and

300 ZNRF3/RNF43 receptors. In addition to the Wnt pathway, R-spondins were  
301 described to affect TGF $\beta$  (Kazanskaya et al., 2004; Zhou et al., 2017) and FGF  
302 (Reis and Sokol, 2020; Zhang et al., 2017) signaling. Although R-spondins are  
303 well known to potentiate Wnt signals in various cells and embryonic tissues (de  
304 Lau et al., 2014; Kazanskaya et al., 2004; Kim et al., 2008; Nam et al., 2006;  
305 Raslan and Yoon, 2019; Wei et al., 2007), we demonstrate an alternative role for  
306 Rspo2 as a Wnt antagonist during anteroposterior patterning. While surprising,  
307 this conclusion is consistent with other reports using zebrafish and cancer cell  
308 lines (Rong et al., 2014; Wang et al., 2018; Wu et al., 2014). We propose that  
309 Rspo2 modulates the Wnt pathway in a context-specific manner.

310

311 Similar to other secreted multidomain molecules, Rspo2 is a pleiotropic regulator  
312 of signaling. We find that Rspo2 inhibits the Wnt pathway via the Furin-like and  
313 the TSP domains, however, it antagonizes the FGF pathway exclusively via the  
314 TSP domain (Reis and Sokol, 2020). The binding of LGR4/5 and ZNRF3/RNF43  
315 receptors to the furin-like domains does not seem to be involved in the Wnt  
316 inhibitory activity of Rspo2. The effect of the TSP domain could be mediated by  
317 its interactions with heparan sulfate proteoglycans that are known to modulate  
318 both FGF and Wnt signaling (Lin and Perrimon, 1999; Rapraeger et al., 1991;  
319 Yayon et al., 1991). These experiments further illustrate the complexity of the  
320 Wnt-FGF crosstalk extending from the extracellular level (Yamamoto et al., 2005)  
321 to transcriptional regulation (Haremaki et al., 2003; Kjolby et al., 2019).

322

323 The main mechanism for R-spondin signaling in adult stem cells is the modulation  
324 of Frizzled degradation by the interaction with LGR4/5 and ZNRF3/RNF43

325 receptors (de Lau et al., 2011; Glinka et al., 2011; Hao et al., 2012). The  
326 phosphorylation of Dishevelled, a proximal marker of Wnt/Frizzled signaling, was  
327 not altered in embryonic tissues with manipulated Rspo2 function. This finding  
328 suggests that Frizzled signaling is not involved. Moreover, mutations abolishing  
329 the binding of LGR4/5 and ZNRF3/RNF43 did not affect the anteriorizing activity  
330 of Rspo2, indicating that these interactions are not involved. At present, we  
331 cannot exclude a role for LRP5/6 in mediating Rspo2 function, as it was reported  
332 to interact with Rspo1, a closely related protein (Binnerts et al., 2007; Wei et al.,  
333 2007). Consistent with recent reports (Dubey et al., 2020; Lebensohn and  
334 Rohatgi, 2018; Park et al., 2018; Szenker-Ravi et al., 2018), we propose that  
335 Rspo2 is a context-dependent Wnt antagonist that may function via yet unknown  
336 receptors.

337

338 Whereas the Rspo2 receptors mediating its effects on early embryos are not  
339 known, we present mechanistic evidence that Rspo2 functions by inhibiting TCF3  
340 phosphorylation. TCF3 is a transcriptional repressor of Wnt targets that is  
341 inactivated by Wnt-dependent phosphorylation during anteroposterior patterning  
342 (Hikasa et al., 2010). This phosphorylation is blocked by Rspo2, thereby  
343 preventing Wnt target activation. In support of this conclusion, non-  
344 phosphorylatable TCF3 rescued Wnt target gene expression in Rspo2-depleted  
345 embryos. It is currently unknown whether Rspo2 modulates the phosphorylation  
346 of other TCF proteins, including the ones with a positive effect on transcription,  
347 such as TCF1 (Cadigan and Waterman, 2012; Sokol, 2011). Notably, Rspo2 did  
348 not inhibit the activity of TCF1 in our experiments. In a different developmental  
349 context, in which the TCF3 is not expressed, yet another TCF protein is

350 phosphorylated by a Wnt signal (Adam et al., 2018; Hikasa and Sokol, 2011), R-  
351 spondins might potentiate Wnt signaling through the same mechanism. Several  
352 TCF proteins are known to be phosphorylated by HIPK2, Nemo-like kinase and  
353 casein kinases 1 and 2 (Hammerlein et al., 2005; Hikasa and Sokol, 2011; Ota et  
354 al., 2012; Smit et al., 2004), but upstream pathways leading to the activation of  
355 these protein kinases remain to be clarified. Additional work is needed to fully  
356 understand the molecular basis for the context-dependent activity of Rspo2 in  
357 embryonic development.

358

## 359 **Methods**

360

### 361 ***Plasmids, in vitro RNA synthesis and morpholino oligonucleotides (MOs).***

362 The DNA clone 6988843 encoding *X. tropicalis* Rspo2 was obtained from  
363 Dharmacon. The plasmid encoding full length Rspo2 (pCS2-Rspo2-Flag) was  
364 generated by inserting PCR-amplified coding region of Rspo2 into the EcoRI and  
365 BamHI sites of pCS2-Flag. Various Rspo2 constructs (Supplementary Table 2)  
366 were generated using single primer-based site-directed mutagenesis as  
367 described (Itoh et al., 1995). pCS2-Rspo $\Delta$ F-Flag lacks amino acids 37-134.  
368 pCS2-Rspo $\Delta$ T-Flag lacks amino acids 147-204. Alanine substitutions have been  
369 made in pCS2-Rspo2-Flag or pCS2-Rspo $\Delta$ T-Flag in the furin-like domain 1  
370 (R65A or Q70A), and furin-like domain 2 (F105A or F109A) to generate Rspo2  
371 that does not bind ZNRF3/RNF43 or LGR4/5 as described (Xie et al., 2013). All  
372 constructs were verified by Sanger sequencing. Details of cloning are available  
373 upon request.

374

375 Capped mRNAs were synthesized using mMessage mMachine kit (Ambion,  
376 Austin, TX). The following linearized plasmids have been used as templates:  
377 pSP64T-Wnt3a (Wolda et al., 1993), pSP64T-Wnt8 (Christian et al., 1991),  
378 pCS2-Wnt8, and pSP64T-Wnt5a (Moon et al., 1993),  $\Delta\beta$ TCF3 (Hikasa et al,  
379 2010), pCS2-TCF1 (Hikasa and Sokol, 2011), pCS2-mRFP (membrane-  
380 targeted), pCS2-Rspo-Flag, pCS2-Rspo $\Delta$ F, pCS2-Rspo $\Delta$ T, pCS2-RspoR65A-  
381 Flag, pCS2-RspoQ70A-Flag, pCS2-RspoF105A-Flag, and pCS2-RspoF109A-  
382 Flag. The following MOs have been purchased from Gene Tools (Philomath, OR):  
383 RMO<sup>ATG</sup>, 5'- AAAGAGTTGAAACTGCATTTGG -3', RMO<sup>SB</sup>, 5'-  
384 GCAGCCTGGATACACAGAAACAAGA-3', control MO (CoMO), 5'-  
385 GCTTCAGCTAGTGACACATGCAT-3'. TCF3MO has been described previously  
386 (Hikasa et al., 2010).

387

### 388 ***Xenopus* embryo culture, microinjections, imaging and statistical analysis.**

389 *In vitro* fertilization and culture of *Xenopus laevis* embryos were carried out as  
390 described (Dollar et al., 2005). Staging was according to Nieuwkoop and Faber  
391 (Nieuwkoop and Faber, 1967). Wnt reporter pbin7Lef $\beta$ GFP transgenic embryos  
392 (Tran et al., 2010) have been obtained from the National Xenopus Resource  
393 (Woods Hole, MA). For microinjections, four-cell embryos were transferred into 3  
394 % Ficoll in 0.5x Marc's Modified Ringer's (MMR) buffer (50 mM NaCl, 1 mM KCl,  
395 1 mM CaCl<sub>2</sub>, 0.5 mM MgCl<sub>2</sub>, 2.5 mM HEPES pH 7.4) (Peng, 1991) and 10 nl of  
396 mRNA or MO solution was injected into one or more blastomeres. Amounts of  
397 injected mRNA and MOs per embryo, indicated in figure legends, have been  
398 optimized in preliminary dose-response experiments. Control MO was injected as



399 at a dose that matched the highest amount of any other MO used in the same  
400 experiment.

401 Embryos were imaged at the indicated stages using Leica Wild M10  
402 stereomicroscope using the OpenLab software. Unless otherwise specified, each  
403 experiment has been carried out at least three times. Statistical analyses were  
404 performed using GraphPad Prism 6 software. Data are mean $\pm$ s.d. and statistical  
405 significance was assessed using an unpaired two-tailed Student's t-test or  
406 Fisher's exact test. Significant differences are indicated by p values, e. g. \*,  
407 p<0.05; \*\*, p<0.01; \*\*\*\*, p<0.0001.

408

#### 409 ***Ectoderm and marginal zone explants, RNA sequencing, RT-qPCR***

410 Ectoderm explants were prepared at late blastula stages and cultured until the  
411 indicated time to observe morphological changes or lysed for RNA extraction or  
412 immunoblotting. Marginal zone explants were dissected at early gastrula stage  
413 and cultured until stage 12.5 when they were lysed for immunoblot analysis.

414 To inhibit FGF receptor activity, ectoderm explants or marginal zone explants  
415 have been cultured with SU5402 (100  $\mu$ M, Calbiochem) from the time of isolation  
416 until they were lysed for immunoblot analysis.

417

418 For quantitative PCR (RT-qPCR) and RNA sequencing, RNA was extracted from  
419 a group of 4-5 embryos, ten animal caps or ten marginal zone explants, at stages  
420 10 or 12.5, using RNeasy kit (Qiagen). RNA sequencing was carried out using  
421 the HiSeq PE150 platform (150 b.p., paired end sequencing) and analyzed by  
422 Novogene (Sacramento, CA). cDNA was made from 1  $\mu$ g of total RNA using  
423 iScript (Bio-Rad). qPCR reactions were amplified using a CFX96 light cycler (Bio-

424 Rad) with Universal SYBR Green Supermix (Bio-Rad). Primer sequences used  
425 for RT-qPCR are listed in Supplementary Table 2. Data represent at least 3  
426 independent experiments each including triplicate samples. All samples were  
427 normalized to control embryos. *eef1a1* served as an internal control. Means +/-  
428 s. d. are shown. Statistical significance was assessed using the Student's *t*-test.

429

### 430 ***Immunoblot analysis.***

431 Immunoblot analysis was carried out essentially as described (Itoh et al., 2005).  
432 Briefly, 10 animal caps or 7 marginal zone explants at stage 12.5 were  
433 homogenized in 50  $\mu$ l of the lysis buffer (50 mM Tris-HCl pH 7.6, 50 mM NaCl, 1  
434 mM EDTA, 1% Triton X-100, 10 mM NaF, 1 mM  $\text{Na}_3\text{VO}_4$ , 25 mM  $\beta$ -glycerol  
435 phosphate, 1 mM PMSF). After centrifugation for 3 min at 16000 g, the  
436 supernatant was subjected to SDS-PAGE and western blot analysis following  
437 standard protocols (Itoh et al., 2005). The following primary antibodies were used:  
438 mouse anti-FLAG (M2, Sigma), mouse anti-non-phosphorylated  $\beta$ -catenin (ABC;  
439 Upstate Biotechnology), rabbit anti-XTCF3N (Zhang et al., 2003), rabbit anti-Dvl2  
440 (Itoh et al., 2005). Staining with rabbit anti-Erk1 (Cell Signaling) was used as  
441 loading control. Chemiluminescence was captured by the ChemiDoc MP imager  
442 (BioRad).

443

### 444 ***In situ hybridization***

445 Whole-mount in situ hybridization with the digoxigenin-labeled antisense RNA  
446 probes for *krt12.4* (Winkles et al., 1985), *foxd1/BF1* (Bourguignon et al., 1998),  
447 and *cdx4* (Reis and Sokol, 2020), was carried out as described (Harland, 1991).

448

449

## 450 **Acknowledgements**

451

452 We thank Miho, Matsuda, Keiji Itoh and Jean-Pierre Saint-Jeannet for the  
453 comments on the manuscript. We also thank Aurelian Radu for the help with the  
454 analysis of RNA sequencing, Olga Ossipova for qPCR primers, Pamela Mancini  
455 for advice on Adobe Illustrator and members of the Sokol laboratory for  
456 discussions. This study has been supported by the NIH grant HD092990 to SYS.

457

## 458 **Author contributions**

459 A.H.R. designed experiments, carried out experiments, analyzed data and wrote  
460 the manuscript. S.Y.S. designed experiments, analyzed data and wrote the  
461 manuscript.

462

463

## 464 **References**

465

466 Adam, R.C., Yang, H., Ge, Y., Lien, W.H., Wang, P., Zhao, Y., Polak, L., Levorse,  
467 J., Baksh, S.C., Zheng, D., *et al.* (2018). Temporal Layering of Signaling  
468 Effectors Drives Chromatin Remodeling during Hair Follicle Stem Cell Lineage  
469 Progression. *Cell Stem Cell* 22, 398-413 e397.

470 Angers, S., and Moon, R.T. (2009). Proximal events in Wnt signal transduction.  
471 *Nat Rev Mol Cell Biol* 10, 468-477.

472 Aoki, M., Kiyonari, H., Nakamura, H., and Okamoto, H. (2008). R-spondin2  
473 expression in the apical ectodermal ridge is essential for outgrowth and  
474 patterning in mouse limb development. *Dev Growth Differ* 50, 85-95.

475 Aoki, M., Mieda, M., Ikeda, T., Hamada, Y., Nakamura, H., and Okamoto, H.  
476 (2007). R-spondin3 is required for mouse placental development. *Dev Biol*  
477 301, 218-226.

478 Bell, S.M., Schreiner, C.M., Wert, S.E., Mucenski, M.L., Scott, W.J., and Whitsett,  
479 J.A. (2008). R-spondin 2 is required for normal laryngeal-tracheal, lung and  
480 limb morphogenesis. *Development* 135, 1049-1058.

481 Binnerts, M.E., Kim, K.A., Bright, J.M., Patel, S.M., Tran, K., Zhou, M., Leung,  
482 J.M., Liu, Y., Lomas, W.E., 3rd, Dixon, M., *et al.* (2007). R-Spondin1 regulates  
483 Wnt signaling by inhibiting internalization of LRP6. *Proc Natl Acad Sci U S A*  
484 104, 14700-14705.

- 485 Blitz, I.L., and Cho, K.W. (1995). Anterior neurectoderm is progressively induced  
486 during gastrulation: the role of the *Xenopus* homeobox gene *orthodenticle*.  
487 *Development* *121*, 993-1004.
- 488 Bourguignon, C., Li, J., and Papalopulu, N. (1998). XBF-1, a winged helix  
489 transcription factor with dual activity, has a role in positioning neurogenesis in  
490 *Xenopus* competent ectoderm. *Development* *125*, 4889-4900.
- 491 Cadigan, K.M., and Waterman, M.L. (2012). TCF/LEFs and Wnt signaling in the  
492 nucleus. *Cold Spring Harb Perspect Biol* *4*.
- 493 Carmon, K.S., Gong, X., Lin, Q., Thomas, A., and Liu, Q. (2011). R-spondins  
494 function as ligands of the orphan receptors LGR4 and LGR5 to regulate  
495 Wnt/beta-catenin signaling. *Proc Natl Acad Sci U S A* *108*, 11452-11457.
- 496 Chalamalasetty, R.B., Garriock, R.J., Dunty, W.C., Jr., Kennedy, M.W., Jailwala,  
497 P., Si, H., and Yamaguchi, T.P. (2014). Mesogenin 1 is a master regulator of  
498 paraxial presomitic mesoderm differentiation. *Development* *141*, 4285-4297.
- 499 Christian, J.L., McMahon, J.A., McMahon, A.P., and Moon, R.T. (1991). *Xwnt-8*,  
500 a *Xenopus* Wnt-1/int-1-related gene responsive to mesoderm-inducing growth  
501 factors, may play a role in ventral mesodermal patterning during  
502 embryogenesis. *Development* *111*, 1045-1055.
- 503 Christian, J.L., and Moon, R.T. (1993). Interactions between *Xwnt-8* and  
504 Spemann organizer signaling pathways generate dorsoventral pattern in the  
505 embryonic mesoderm of *Xenopus*. *Genes Dev* *7*, 13-28.
- 506 de Lau, W., Barker, N., Low, T.Y., Koo, B.K., Li, V.S., Teunissen, H., Kujala, P.,  
507 Haegebarth, A., Peters, P.J., van de Wetering, M., *et al.* (2011). *Lgr5*  
508 homologues associate with Wnt receptors and mediate R-spondin signalling.  
509 *Nature* *476*, 293-297.
- 510 de Lau, W., Peng, W.C., Gros, P., and Clevers, H. (2014). The R-  
511 spondin/*Lgr5*/*Rnf43* module: regulator of Wnt signal strength. *Genes Dev* *28*,  
512 305-316.
- 513 De Robertis, E.M., and Kuroda, H. (2004). Dorsal-ventral patterning and neural  
514 induction in *Xenopus* embryos. *Annu Rev Cell Dev Biol* *20*, 285-308.
- 515 Ding, Y., Ploper, D., Sosa, E.A., Colozza, G., Moriyama, Y., Benitez, M.D.,  
516 Zhang, K., Merkurjev, D., and De Robertis, E.M. (2017). Spemann organizer  
517 transcriptome induction by early beta-catenin, Wnt, Nodal, and Siamois signals  
518 in *Xenopus laevis*. *Proc Natl Acad Sci U S A* *114*, E3081-E3090.
- 519 Dollar, G.L., Weber, U., Mlodzik, M., and Sokol, S.Y. (2005). Regulation of Lethal  
520 giant larvae by Dishevelled. *Nature* *437*, 1376-1380.
- 521 Domingos, P.M., Itasaki, N., Jones, C.M., Mercurio, S., Sargent, M.G., Smith,  
522 J.C., and Krumlauf, R. (2001). The Wnt/beta-catenin pathway posteriorizes  
523 neural tissue in *Xenopus* by an indirect mechanism requiring FGF signalling.  
524 *Dev Biol* *239*, 148-160.
- 525 Dubey, R., van Kerkhof, P., Jordens, I., Malinauskas, T., Pusapati, G.V.,  
526 McKenna, J.K., Li, D., Carette, J.E., Ho, M., Siebold, C., *et al.* (2020). R-  
527 spondins engage heparan sulfate proteoglycans to potentiate WNT signaling.  
528 *Elife* *9*.
- 529 Fletcher, R.B., and Harland, R.M. (2008). The role of FGF signaling in the  
530 establishment and maintenance of mesodermal gene expression in *Xenopus*.  
531 *Dev Dyn* *237*, 1243-1254.
- 532 Glinka, A., Dolde, C., Kirsch, N., Huang, Y.L., Kazanskaya, O., Ingelfinger, D.,  
533 Boutros, M., Cruciat, C.M., and Niehrs, C. (2011). LGR4 and LGR5 are R-

- 534 spondin receptors mediating Wnt/beta-catenin and Wnt/PCP signalling. *EMBO*  
535 *Rep* 12, 1055-1061.
- 536 Glinka, A., Wu, W., Delius, H., Monaghan, A.P., Blumenstock, C., and Niehrs, C.  
537 (1998). Dickkopf-1 is a member of a new family of secreted proteins and  
538 functions in head induction. *Nature* 391, 357-362.
- 539 Hamilton, F.S., Wheeler, G.N., and Hoppler, S. (2001). Difference in XTcf-3  
540 dependency accounts for change in response to beta-catenin-mediated Wnt  
541 signalling in *Xenopus* blastula. *Development* 128, 2063-2073.
- 542 Hammerlein, A., Weiske, J., and Huber, O. (2005). A second protein kinase CK1-  
543 mediated step negatively regulates Wnt signalling by disrupting the lymphocyte  
544 enhancer factor-1/beta-catenin complex. *Cell Mol Life Sci* 62, 606-618.
- 545 Hao, H.X., Xie, Y., Zhang, Y., Charlat, O., Oster, E., Avello, M., Lei, H., Mickanin,  
546 C., Liu, D., Ruffner, H., *et al.* (2012). ZNRF3 promotes Wnt receptor turnover  
547 in an R-spondin-sensitive manner. *Nature* 485, 195-200.
- 548 Harekaki, T., Tanaka, Y., Hongo, I., Yuge, M., and Okamoto, H. (2003).  
549 Integration of multiple signal transducing pathways on Fgf response elements  
550 of the *Xenopus* caudal homologue Xcad3. *Development* 130, 4907-4917.
- 551 Harland, R.M. (1991). *In situ* hybridization: an improved whole-mount method for  
552 *Xenopus* embryos. In *Methods Cell Biol*, B.K. Kay, and H.B. Peng, eds. (San  
553 Diego: Academic Press Inc.), pp. 685-695.
- 554 Heasman, J. (2006). Patterning the early *Xenopus* embryo. *Development* 133,  
555 1205-1217.
- 556 Heasman, J., Kofron, M., and Wylie, C. (2000). Beta-catenin signaling activity  
557 dissected in the early *Xenopus* embryo: a novel antisense approach. *Dev Biol*  
558 222, 124-134.
- 559 Hikasa, H., Ezan, J., Itoh, K., Li, X., Klymkowsky, M.W., and Sokol, S.Y. (2010).  
560 Regulation of TCF3 by Wnt-dependent phosphorylation during vertebrate axis  
561 specification. *Dev Cell* 19, 521-532.
- 562 Hikasa, H., and Sokol, S.Y. (2011). Phosphorylation of TCF proteins by  
563 homeodomain-interacting protein kinase 2. *J Biol Chem* 286, 12093-12100.
- 564 Hikasa, H., and Sokol, S.Y. (2013). Wnt signaling in vertebrate axis specification.  
565 *Cold Spring Harb Perspect Biol* 5, a007955.
- 566 Hoppler, S., Brown, J.D., and Moon, R.T. (1996). Expression of a dominant-  
567 negative Wnt blocks induction of MyoD in *Xenopus* embryos. *Genes Dev* 10,  
568 2805-2817.
- 569 Itoh, K., Antipova, A., Ratcliffe, M.J., and Sokol, S. (2000). Interaction of  
570 dishevelled and *Xenopus* axin-related protein is required for wnt signal  
571 transduction. *Mol Cell Biol* 20, 2228-2238.
- 572 Itoh, K., Brott, B.K., Bae, G.U., Ratcliffe, M.J., and Sokol, S.Y. (2005). Nuclear  
573 localization is required for Dishevelled function in Wnt/beta-catenin signaling.  
574 *J Biol* 4, 3.
- 575 Itoh, K., Tang, T.L., Neel, B.G., and Sokol, S.Y. (1995). Specific modulation of  
576 ectodermal cell fates in *Xenopus* embryos by glycogen synthase kinase.  
577 *Development* 121, 3979-3988.
- 578 Jho, E.H., Zhang, T., Domon, C., Joo, C.K., Freund, J.N., and Costantini, F.  
579 (2002). Wnt/beta-catenin/Tcf signaling induces the transcription of Axin2, a  
580 negative regulator of the signaling pathway. *Mol Cell Biol* 22, 1172-1183.
- 581 Kazanskaya, O., Glinka, A., del Barco Barrantes, I., Stanek, P., Niehrs, C., and  
582 Wu, W. (2004). R-Spondin2 is a secreted activator of Wnt/beta-catenin  
583 signaling and is required for *Xenopus* myogenesis. *Dev Cell* 7, 525-534.

- 584 Kazanskaya, O., Ohkawara, B., Heroult, M., Wu, W., Maltry, N., Augustin, H.G.,  
585 and Niehrs, C. (2008). The Wnt signaling regulator R-spondin 3 promotes  
586 angioblast and vascular development. *Development* *135*, 3655-3664.
- 587 Kiecker, C., and Niehrs, C. (2001). A morphogen gradient of Wnt/beta-catenin  
588 signalling regulates anteroposterior neural patterning in *Xenopus*.  
589 *Development* *128*, 4189-4201.
- 590 Kim, C.H., Oda, T., Itoh, M., Jiang, D., Artinger, K.B., Chandrasekharappa, S.C.,  
591 Driever, W., and Chitnis, A.B. (2000). Repressor activity of Headless/Tcf3 is  
592 essential for vertebrate head formation. *Nature* *407*, 913-916.
- 593 Kim, K.A., Wagle, M., Tran, K., Zhan, X., Dixon, M.A., Liu, S., Gros, D., Korver,  
594 W., Yonkovich, S., Tomasevic, N., *et al.* (2008). R-Spondin family members  
595 regulate the Wnt pathway by a common mechanism. *Mol Biol Cell* *19*, 2588-  
596 2596.
- 597 Kjolby, R.A.S., and Harland, R.M. (2017). Genome-wide identification of  
598 Wnt/beta-catenin transcriptional targets during *Xenopus* gastrulation. *Dev Biol*  
599 *426*, 165-175.
- 600 Kjolby, R.A.S., Truchado-Garcia, M., Iruvanti, S., and Harland, R.M. (2019).  
601 Integration of Wnt and FGF signaling in the *Xenopus* gastrula at TCF and Ets  
602 binding sites shows the importance of short-range repression by TCF in  
603 patterning the marginal zone. *Development* *146*.
- 604 Koo, B.K., Spit, M., Jordens, I., Low, T.Y., Stange, D.E., van de Wetering, M., van  
605 Es, J.H., Mohammed, S., Heck, A.J., Maurice, M.M., *et al.* (2012). Tumour  
606 suppressor RNF43 is a stem-cell E3 ligase that induces endocytosis of Wnt  
607 receptors. *Nature* *488*, 665-669.
- 608 Lebensohn, A.M., and Rohatgi, R. (2018). R-spondins can potentiate WNT  
609 signaling without LGRs. *Elife* *7*.
- 610 Lin, X., and Perrimon, N. (1999). Dally cooperates with *Drosophila* Frizzled 2 to  
611 transduce Wingless signalling. *Nature* *400*, 281-284.
- 612 MacDonald, B.T., Tamai, K., and He, X. (2009). Wnt/beta-catenin signaling:  
613 components, mechanisms, and diseases. *Dev Cell* *17*, 9-26.
- 614 McGrew, L.L., Hoppler, S., and Moon, R.T. (1997). Wnt and FGF pathways  
615 cooperatively pattern anteroposterior neural ectoderm in *Xenopus*. *Mech Dev*  
616 *69*, 105-114.
- 617 Mohammadi, M., McMahon, G., Sun, L., Tang, C., Hirth, P., Yeh, B.K., Hubbard,  
618 S.R., and Schlessinger, J. (1997). Structures of the tyrosine kinase domain of  
619 fibroblast growth factor receptor in complex with inhibitors. *Science* *276*, 955-  
620 960.
- 621 Moon, R.T., Campbell, R.M., Christian, J.L., McGrew, L.L., Shih, J., and Fraser,  
622 S. (1993). Xwnt-5A: a maternal Wnt that affects morphogenetic movements  
623 after overexpression in embryos of *Xenopus laevis*. *Development* *119*, 97-111.
- 624 Nakamura, Y., de Paiva Alves, E., Veenstra, G.J., and Hoppler, S. (2016). Tissue-  
625 and stage-specific Wnt target gene expression is controlled subsequent to  
626 beta-catenin recruitment to cis-regulatory modules. *Development* *143*, 1914-  
627 1925.
- 628 Nakamura, Y., and Hoppler, S. (2017). Genome-wide analysis of canonical Wnt  
629 target gene regulation in *Xenopus tropicalis* challenges beta-catenin paradigm.  
630 *Genesis* *55*.
- 631 Nam, J.S., Park, E., Turcotte, T.J., Palencia, S., Zhan, X., Lee, J., Yun, K., Funk,  
632 W.D., and Yoon, J.K. (2007). Mouse R-spondin2 is required for apical  
633 ectodermal ridge maintenance in the hindlimb. *Dev Biol* *311*, 124-135.

- 634 Nam, J.S., Turcotte, T.J., Smith, P.F., Choi, S., and Yoon, J.K. (2006). Mouse  
635 cristin/R-spondin family proteins are novel ligands for the Frizzled 8 and LRP6  
636 receptors and activate beta-catenin-dependent gene expression. *J Biol Chem*  
637 *281*, 13247-13257.
- 638 Nguyen, H., Rendl, M., and Fuchs, E. (2006). Tcf3 governs stem cell features  
639 and represses cell fate determination in skin. *Cell* *127*, 171-183.
- 640 Niehrs, C. (2012). The complex world of WNT receptor signalling. *Nat Rev Mol*  
641 *Cell Biol* *13*, 767-779.
- 642 Nieuwkoop, P.D., and Faber, J. (1967). Normal Table of *Xenopus laevis* (Daudin)  
643 (Amsterdam: North Holland).
- 644 Northrop, J.L., and Kimelman, D. (1994). Dorsal-ventral differences in Xcad-3  
645 expression in response to FGF-mediated induction in *Xenopus*. *Dev Biol* *161*,  
646 490-503.
- 647 Nusse, R., and Clevers, H. (2017). Wnt/beta-Catenin Signaling, Disease, and  
648 Emerging Therapeutic Modalities. *Cell* *169*, 985-999.
- 649 Ota, S., Ishitani, S., Shimizu, N., Matsumoto, K., Itoh, M., and Ishitani, T. (2012).  
650 NLK positively regulates Wnt/beta-catenin signalling by phosphorylating LEF1  
651 in neural progenitor cells. *EMBO J* *31*, 1904-1915.
- 652 Pannese, M., Polo, C., Andreazzoli, M., Vignali, R., Kablar, B., Barsacchi, G., and  
653 Boncinelli, E. (1995). The *Xenopus* homologue of Otx2 is a maternal  
654 homeobox gene that demarcates and specifies anterior body regions.  
655 *Development* *121*, 707-720.
- 656 Park, S., Cui, J., Yu, W., Wu, L., Carmon, K.S., and Liu, Q.J. (2018). Differential  
657 activities and mechanisms of the four R-spondins in potentiating Wnt/beta-  
658 catenin signaling. *J Biol Chem* *293*, 9759-9769.
- 659 Peng, H.B. (1991). *Xenopus laevis*: Practical uses in cell and molecular biology.  
660 Solutions and protocols. *Methods Cell Biol* *36*, 657-662.
- 661 Picard, J.J. (1975). *Xenopus laevis* cement gland as an experimental model for  
662 embryonic differentiation. II. The competence of embryonic cells. *J Embryol*  
663 *Exp Morphol* *33*, 969-978.
- 664 Rapraeger, A.C., Krufka, A., and Olwin, B.B. (1991). Requirement of heparan  
665 sulfate for bFGF-mediated fibroblast growth and myoblast differentiation.  
666 *Science* *252*, 1705-1708.
- 667 Raslan, A.A., and Yoon, J.K. (2019). R-spondins: Multi-mode WNT signaling  
668 regulators in adult stem cells. *Int J Biochem Cell Biol* *106*, 26-34.
- 669 Reis, A.H., and Sokol, S.Y. (2020). Rspo2 antagonizes FGF signaling during  
670 vertebrate mesoderm formation and patterning. *Development* *147*.
- 671 Rong, X., Chen, C., Zhou, P., Zhou, Y., Li, Y., Lu, L., Liu, Y., Zhou, J., and Duan,  
672 C. (2014). R-spondin 3 regulates dorsoventral and anteroposterior patterning  
673 by antagonizing Wnt/beta-catenin signaling in zebrafish embryos. *PLoS One*  
674 *9*, e99514.
- 675 Sive, H.L., Hattori, K., and Weintraub, H. (1989). Progressive determination during  
676 formation of the anteroposterior axis of *Xenopus laevis*. *Cell* *58*, 171-180.
- 677 Smit, L., Baas, A., Kuipers, J., Korswagen, H., van de Wetering, M., and Clevers,  
678 H. (2004). Wnt activates the Tak1/Nemo-like kinase pathway. *J Biol Chem* *279*,  
679 17232-17240.
- 680 Sokol, S.Y. (2011). Wnt signaling through T-cell factor phosphorylation. *Cell Res.*  
681 Szenker-Ravi, E., Altunoglu, U., Leushacke, M., Bosso-Lefevre, C., Khatoor, M.,  
682 Thi Tran, H., Naert, T., Noelanders, R., Hajamohideen, A., Beneteau, C., *et al.*

- 683 (2018). RSPO2 inhibition of RNF43 and ZNRF3 governs limb development  
684 independently of LGR4/5/6. *Nature* 557, 564-569.
- 685 Tatsumi, Y., Takeda, M., Matsuda, M., Suzuki, T., and Yokoi, H. (2014). TALEN-  
686 mediated mutagenesis in zebrafish reveals a role for r-spondin 2 in fin ray and  
687 vertebral development. *FEBS Lett* 588, 4543-4550.
- 688 Tran, H.T., Sekkali, B., Van Imschoot, G., Janssens, S., and Vleminckx, K.  
689 (2010). Wnt/beta-catenin signaling is involved in the induction and  
690 maintenance of primitive hematopoiesis in the vertebrate embryo. *Proc Natl*  
691 *Acad Sci U S A* 107, 16160-16165.
- 692 Wang, B., Yang, F., Li, R., Li, X., Wu, X., Sun, Z., Zhai, J., He, Y., and Qi, J.  
693 (2018). Functional characterization of *Cynoglossus semilaevis* R-spondin2  
694 and its role in muscle development during embryogenesis. *Genes Genet Syst*  
695 93, 181-190.
- 696 Wang, D., Huang, B., Zhang, S., Yu, X., Wu, W., and Wang, X. (2013). Structural  
697 basis for R-spondin recognition by LGR4/5/6 receptors. *Genes Dev* 27, 1339-  
698 1344.
- 699 Wang, S., Krinks, M., Lin, K., Luyten, F.P., and Moos, M., Jr. (1997). Frzb, a  
700 secreted protein expressed in the Spemann organizer, binds and inhibits Wnt-  
701 8. *Cell* 88, 757-766.
- 702 Wei, Q., Yokota, C., Semenov, M.V., Doble, B., Woodgett, J., and He, X. (2007).  
703 R-spondin1 is a high affinity ligand for LRP6 and induces LRP6  
704 phosphorylation and beta-catenin signaling. *J Biol Chem* 282, 15903-15911.
- 705 Winkles, J.A., Sargent, T.D., Parry, D.A., Jonas, E., and Dawid, I.B. (1985).  
706 Developmentally regulated cytochrome gene in *Xenopus laevis*. *Mol Cell Biol*  
707 5, 2575-2581.
- 708 Wittler, L., Shin, E.H., Grote, P., Kispert, A., Beckers, A., Gossler, A., Werber, M.,  
709 and Herrmann, B.G. (2007). Expression of *Msgn1* in the presomitic mesoderm  
710 is controlled by synergism of WNT signalling and *Tbx6*. *EMBO Rep* 8, 784-  
711 789.
- 712 Wolda, S.L., Moody, C.J., and Moon, R.T. (1993). Overlapping expression of  
713 *Xwnt-3A* and *Xwnt-1* in neural tissue of *Xenopus laevis* embryos. *Dev Biol* 155,  
714 46-57.
- 715 Wu, C., Qiu, S., Lu, L., Zou, J., Li, W.F., Wang, O., Zhao, H., Wang, H., Tang, J.,  
716 Chen, L., *et al.* (2014). RSPO2-LGR5 signaling has tumour-suppressive  
717 activity in colorectal cancer. *Nat Commun* 5, 3149.
- 718 Xie, Y., Zamponi, R., Charlat, O., Ramones, M., Swalley, S., Jiang, X., Rivera,  
719 D., Tschantz, W., Lu, B., Quinn, L., *et al.* (2013). Interaction with both ZNRF3  
720 and LGR4 is required for the signalling activity of R-spondin. *EMBO Rep* 14,  
721 1120-1126.
- 722 Yamada, W., Nagao, K., Horikoshi, K., Fujikura, A., Ikeda, E., Inagaki, Y.,  
723 Kakitani, M., Tomizuka, K., Miyazaki, H., Suda, T., *et al.* (2009). Craniofacial  
724 malformation in R-spondin2 knockout mice. *Biochem Biophys Res Commun*  
725 381, 453-458.
- 726 Yamamoto, A., Nagano, T., Takehara, S., Hibi, M., and Aizawa, S. (2005). Shisa  
727 promotes head formation through the inhibition of receptor protein maturation  
728 for the caudalizing factors, Wnt and FGF. *Cell* 120, 223-235.
- 729 Yan, K.S., Janda, C.Y., Chang, J., Zheng, G.X.Y., Larkin, K.A., Luca, V.C., Chia,  
730 L.A., Mah, A.T., Han, A., Terry, J.M., *et al.* (2017). Non-equivalence of Wnt and  
731 R-spondin ligands during *Lgr5(+)* intestinal stem-cell self-renewal. *Nature* 545,  
732 238-242.



- 733 Yanagawa, S., van Leeuwen, F., Wodarz, A., Klingensmith, J., and Nusse, R.  
734 (1995). The dishevelled protein is modified by wiggless signaling in *Drosophila*.  
735 *Genes Dev* 9, 1087-1097.
- 736 Yayon, A., Klagsbrun, M., Esko, J.D., Leder, P., and Ornitz, D.M. (1991). Cell  
737 surface, heparin-like molecules are required for binding of basic fibroblast  
738 growth factor to its high affinity receptor. *Cell* 64, 841-848.
- 739 Zebisch, M., and Jones, E.Y. (2015). Crystal structure of R-spondin 2 in complex  
740 with the ectodomains of its receptors LGR5 and ZNRF3. *J Struct Biol* 191, 149-  
741 155.
- 742 Zhang, C., Basta, T., Jensen, E.D., and Klymkowsky, M.W. (2003). The beta-  
743 catenin/VegT-regulated early zygotic gene *Xnr5* is a direct target of SOX3  
744 regulation. *Development* 130, 5609-5624.
- 745 Zhang, M., Zhang, P., Liu, Y., Lv, L., Zhang, X., Liu, H., and Zhou, Y. (2017).  
746 RSPO3-LGR4 Regulates Osteogenic Differentiation Of Human Adipose-  
747 Derived Stem Cells Via ERK/FGF Signalling. *Sci Rep* 7, 42841.
- 748 Zhang, X., Abreu, J.G., Yokota, C., MacDonald, B.T., Singh, S., Coburn, K.L.,  
749 Cheong, S.M., Zhang, M.M., Ye, Q.Z., Hang, H.C., *et al.* (2012). Tiki1 is  
750 required for head formation via Wnt cleavage-oxidation and inactivation. *Cell*  
751 149, 1565-1577.
- 752 Zhou, X., Geng, L., Wang, D., Yi, H., Talmon, G., and Wang, J. (2017). R-  
753 Spondin1/LGR5 Activates TGFbeta Signaling and Suppresses Colon Cancer  
754 Metastasis. *Cancer Res* 77, 6589-6602.
- 755  
756  
757  
758  
759  
760  
761

762 **Figure legends**

763 **Figure 1. Rspo2 function is essential for anterior development.** (A, B) Four-  
764 cell embryos were injected with 0.5 ng of Rspo2 RNA into both animal-ventral  
765 blastomeres and cultured until stage 28. (A) Uninjected control embryo. (B)  
766 Representative embryo injected with Rspo2 RNA. The penetrance is indicated  
767 as the ratio of the number of embryos with the phenotype and the total number  
768 of injected embryos. (C) The effect of Rspo2 on gene marker expression.  
769 Animal pole explants were dissected at stage 9 from embryos overexpressing  
770 Rspo2 RNA or uninjected controls. RT-qPCR analysis was carried out for *otx2*,  
771 *ag1*, and *krt12.4* at stage 18. (D) Altered gene expression in Rspo2 morphants.  
772 RNA was isolated from stage 18 control embryos or embryos depleted of  
773 Rspo2. RT-qPCR for *ag1* and *otx2* was carried out in triplicates. (C, D) Each  
774 graph is a single experiment with triplicate samples, representative from at least  
775 3 independent experiments. Means +/- s. d. are shown. Statistical significance  
776 has been assessed by Student's *t* test, \*,  $p < 0.05$ . (E-J) *In situ* hybridization of  
777 control and manipulated stage 16 or 25 embryos with *krt12.4* (E-G), *foxg1* and  
778 *cdx4* (H-J) probes. (E-G) Width of the anterior neural plate is shown as lack of  
779 *krt12.4* (arrows). (H-J) The *foxg1* domain is indicated by white arrows, the  
780 anterior region lacking *cdx4* - by dashed lines. See Supplementary Table 1 for  
781 quantification.

782

783 **Figure 2. Rspo2 antagonizes Wnt signaling.** (A) Scheme of the experiment.  
784 Four-cell embryos were injected animally into both dorsal blastomeres with the  
785 indicated constructs and cultured to stage 38. B, Uninjected control embryo. C,  
786 Headless embryo injected with Wnt8 DNA (50 pg). D, Embryo injected with

787 Rspo2 RNA (0.5 ng). E, Embryo coexpressing Wnt8 DNA and Rspo2 mRNA.  
788 (F) Quantification of the data in A-D, representative of 3 independent  
789 experiments. Numbers of embryos per group are shown above each bar. \*\*\*\*,  
790  $p < 0.0001$ , Fisher's exact test. (G) Target gene expression in Wnt8 and Rspo2-  
791 stimulated ectoderm explants. Embryos were injected into four animal  
792 blastomeres with Wnt8 DNA (50 pg) and Rspo2 RNA (0.5 ng), as indicated, and  
793 ectoderm explants were prepared at stage 9 and cultured until stage 13. (H)  
794 Dorsal marginal zones (DMZ) were dissected at stage 10 from the control and  
795 Rspo2 RNA- or RMO<sup>ATG</sup>-injected embryos and cultured until stage 12. (G, H)  
796 RT-qPCR analysis was carried out in triplicates for *axin2* and *cdx4*, and  
797 normalized to *eef1a1* levels. Means +/- s.d. are shown. Graphs are  
798 representative of three independent experiments. Statistical significance has  
799 been assessed by Student's *t* test, \*,  $p < 0.05$ ; \*\*,  $p < 0.01$ .

800

801 **Figure 3. The effects of Rspo2 manipulation on Wnt reporter activity in**  
802 **transgenic embryos.** (A) Experimental scheme. *Xla.Tg(WntREs:dEGFP)<sup>Vlemx</sup>*  
803 embryos were injected into one dorsal blastomere with mRFP RNA (50 pg) with  
804 (C) or without (B) Rspo2 RNA (0.5 ng). GFP fluorescence of the injected  
805 embryos at stage 18 is shown. Embryo images are representative of 3 different  
806 experiments. Asterisk indicates the injected side of the embryo, brackets in C  
807 show the comparison of the injected and the control sides. (D, E) Rspo2  
808 modulates Wnt reporter activation. (D) Rspo2 RNA (0.5 ng), RMO<sup>ATG</sup> (10 ng) or  
809 RMO<sup>SB</sup> (20 ng) were injected at two dorsal blastomeres at 4-cell stage. The  
810 embryos were lysed at stage 20 and immunoblotted with anti-GFP antibodies.  
811 (E) Four-cell stage embryos were injected anically with Wnt3a RNA (50 pg)

812 and Rspo2 RNAs (0.5 ng) or RMO<sup>ATG</sup> (10 ng). Ectoderm explants were  
813 dissected at stage 9 and cultured until stage 13, then lysed and immunoblotted  
814 with anti-GFP antibodies. Erk1 is a control for loading in C, D.

815

816 **Figure 4. Rspo2 inhibits TCF3 phosphorylation.** (A) Schematic of Rspo2  
817 deletion constructs. SP, signal peptide; FU1, furin-like domain 1; FU2, furin-like  
818 domain 2; TSP, thrombospondin type 1 domain; BR, the basic amino acid-rich  
819 domain. (B, C) Effects of Rspo2 constructs on Wnt-dependent Dvl2  
820 phosphorylation (B) and TCF3 phosphorylation and  $\beta$ -catenin levels (C). Four-  
821 cell stage embryos were injected anically with Wnt8 DNA (50 pg or 100 pg) or  
822 Wnt8, Wnt3a or Wnt5a RNAs (1 ng each) and Rspo2, Rspo $\Delta$ F or Rspo $\Delta$ T  
823 RNAs (0.5 ng each) as indicated. Ectoderm explants were dissected at stage 9  
824 and cultured until stage 12 for immunoblotting with antibodies against Dvl2,  
825 TCF3, ABC (non-phosphorylated  $\beta$ -catenin). Arrowheads indicate the position of  
826 phosphorylated (upshifted) and non-phosphorylated Dvl2 or TCF3 proteins.  
827 Erk1 controls for loading. D, SU5402 does not block TCF3 phosphorylation in  
828 ectoderm stimulated by Wnt3a. E, Effects of Rspo2 constructs (0.5 ng each) on  
829 TCF3 phosphorylated by endogenous signals. Dorsal marginal zone (D) and  
830 ventral marginal zone (V) were dissected from the control and injected embryos  
831 at stage 10 and cultured until stage 12.5 for immunoblotting with anti-TCF3  
832 antibodies as shown. F, Effects of SU5402 on TCF3 phosphorylation in  
833 marginal zone explants. G, Effects of Rspo2 depletion on TCF3  
834 phosphorylation by endogenous signals. DMZ and VMZ explants of embryos  
835 injected with control MO (COMO, 20 ng) or RMO<sup>ATG</sup> (20 ng) were dissected and  
836 analyzed by immunoblotting as in (B, C).

837

838 **Figure 5. TCF3 is essential for Rspo2 inhibitory effects.** A, TCF3MO  
839 rescues the anteriorized phenotype of Rspo $\Delta$ T RNA overexpressing embryos.  
840 Four-cell stage embryos were dorsally injected with TCF3MO (30 ng) and/or  
841 Rspo $\Delta$ T RNA (0.5 ng). Arrowheads indicate the cement gland. B, Quantification  
842 of the data in A, representative of two independent experiments. Numbers of  
843 embryos per group are shown above each bar. C, Rspo $\Delta$ T expression levels  
844 are not altered by TCF3MO in ectoderm explants (stage 12) in two independent  
845 experiments (Exp 1 and Exp 2).  $\Delta$ T, Rspo $\Delta$ T; TMO, TCF3MO.

846

847 **Figure 6. Rspo2 inhibits Wnt signaling through TCF3.** A,  $\Delta\beta$ TCF3 RNA (10  
848 pg) rescues *ag1*, *otx2*, *cdx4*, and *mshn1* expression in embryos injected with 10  
849 ng of RMO<sup>ATG</sup>. B, Rspo2 inhibits *axin2* upregulation by Wnt8 but not TCF1 in  
850 ectoderm cells. Embryos were injected with Wnt8 (20 pg) or TCF1 (100 pg)  
851 RNA without or with Rspo2 RNA (300 pg). Ectoderm explants were prepared at  
852 stage 8.5-9 and analyzed at stage 13. RT-qPCR analysis was carried out in  
853 triplicates for *axin2* and normalized to *eef1a1* levels. Means +/- s.d. are shown.  
854 Graphs are representative of 2-4 independent experiments. Statistical  
855 significance has been assessed by Student's *t* test, \*,  $p < 0.05$ . C, Model for  
856 Rspo2-mediated repression. Rspo2 inhibits Wnt target activation mediated by  
857 TCF3 phosphorylation but not the TCF1-dependent response.

858

859

860

861

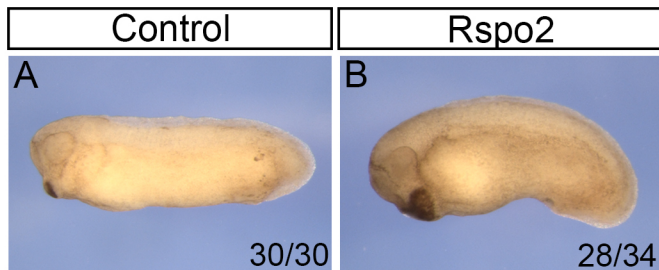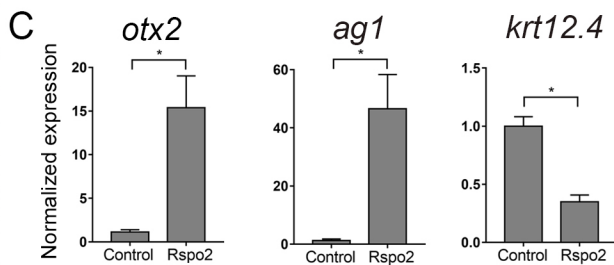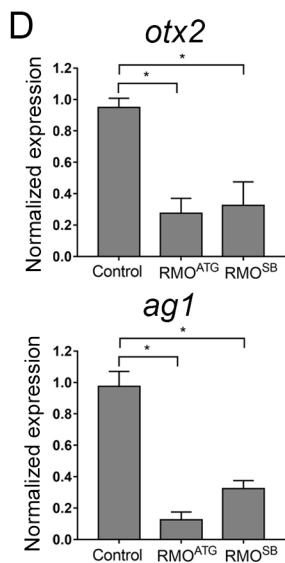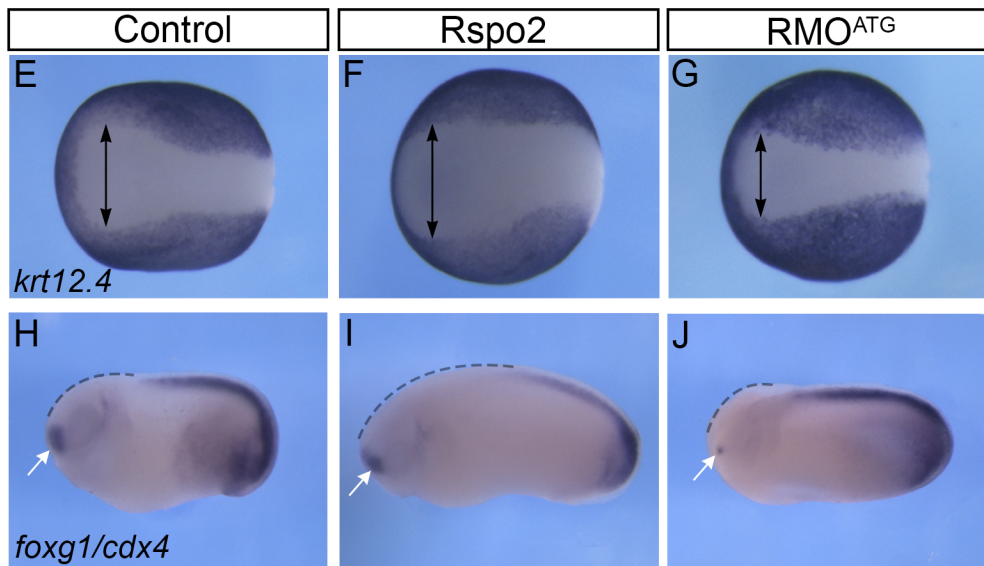

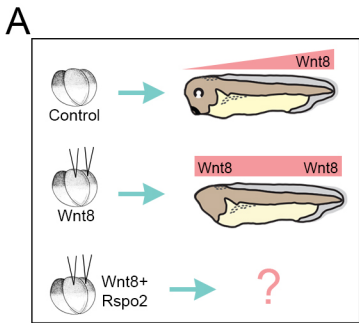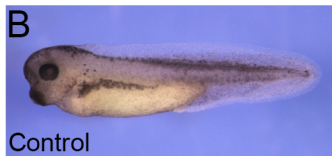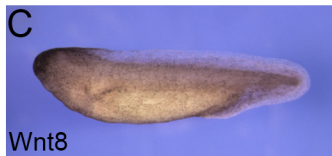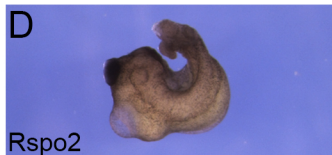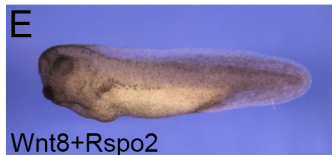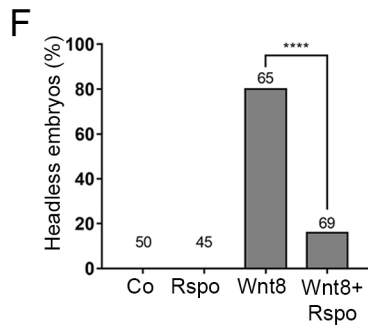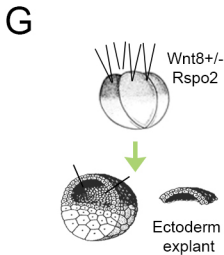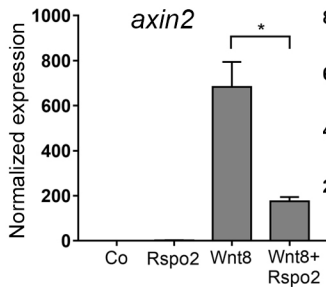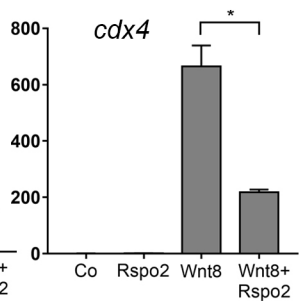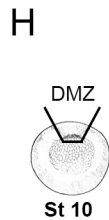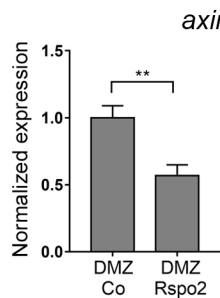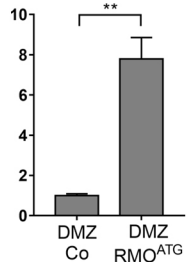

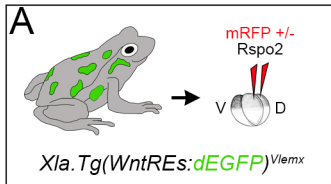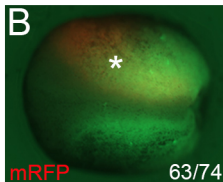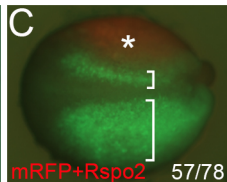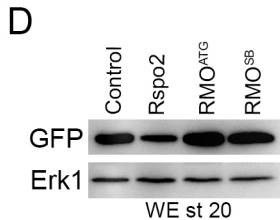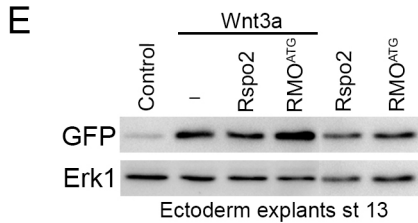





**A**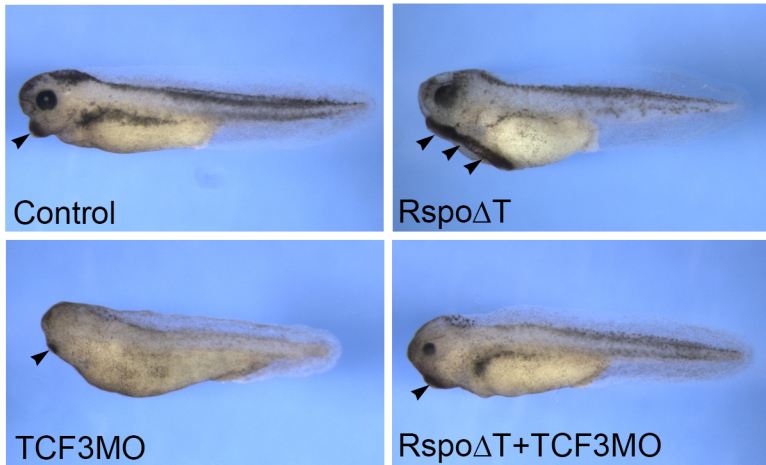**B**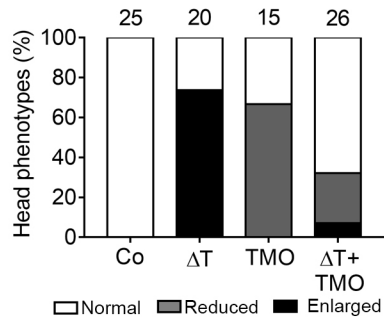**C**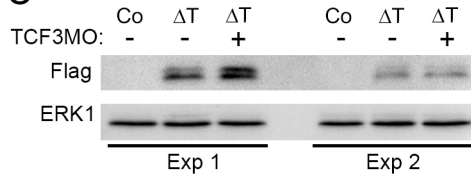

A

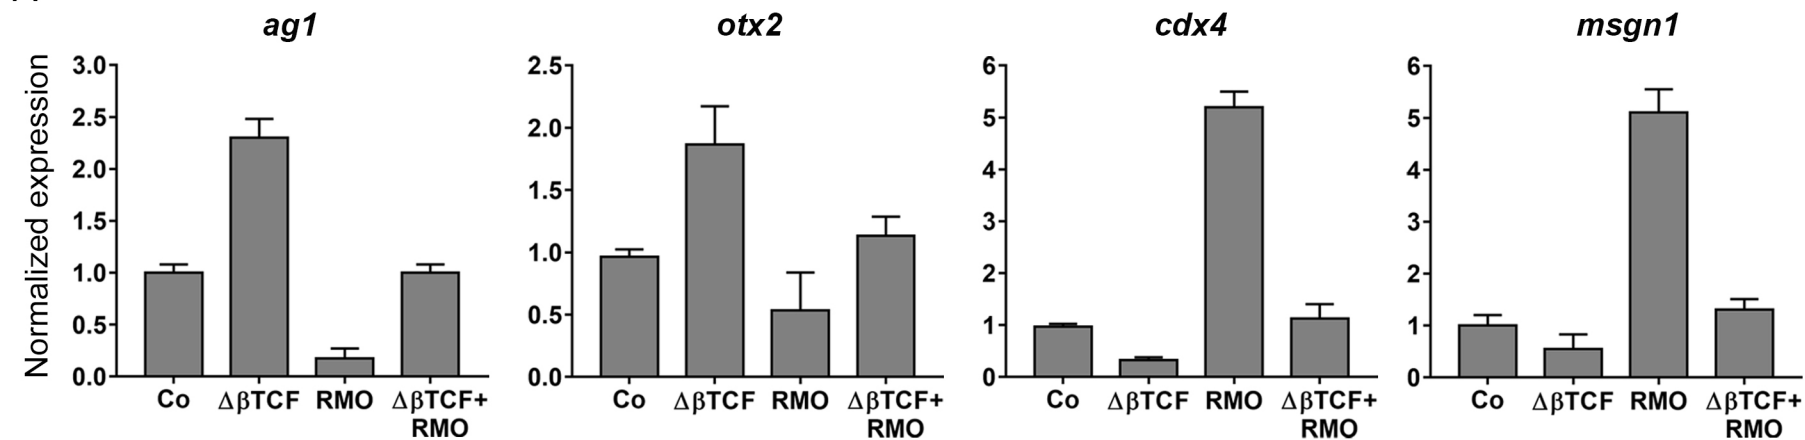

B

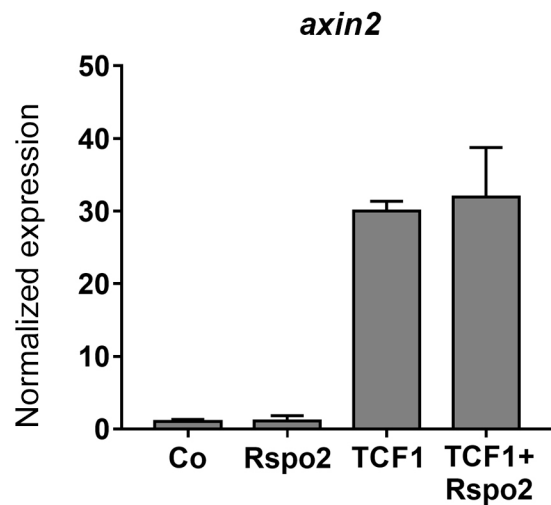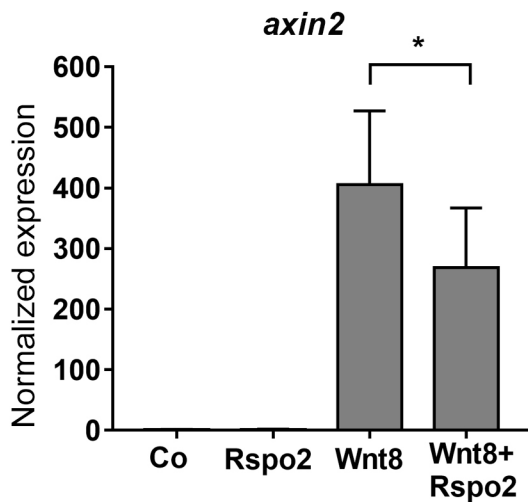

C

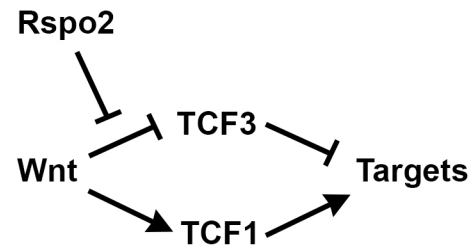

Source: https://www.biorxiv.org/content/10.1101/2020.10.30.362541v1.full.pdf
